# Supplementary material for: Quantifying and Analyzing the Network Basis of Genetic Complexity
Source: PLoS Comput Biol. 2012 Jul 5;8(7):e1002583. doi: 10.1371/journal.pcbi.1002583 (PMC3390359; doi:10.1371/journal.pcbi.1002583)
Supplement: Table S1 — The complexity of Boolean networks as a function of order. (XLSX) [file pcbi.1002583.s005.xlsx]

## Sheet: Sheet1
Order	C
1	0.5
2	10.09
3	1042.94
