# Supplementary material for: Quantifying and Analyzing the Network Basis of Genetic Complexity
Source: PLoS Comput Biol. 2012 Jul 5;8(7):e1002583. doi: 10.1371/journal.pcbi.1002583 (PMC3390359; doi:10.1371/journal.pcbi.1002583)
Supplement: Table S2 — The complexity of order-three Boolean networks as a function of size. (XLSX) [file pcbi.1002583.s006.xlsx]

## Sheet: Sheet1
Size	C
0	0
1	2.73684
2	12.3721
3	28.8862
4	52.0174
5	81.1564
6	232.71
7	259.514
8	696.173
9	728.645
